# Supplementary material
Source: PubMed Central journal article supplement (PMC11492141)
Supplement: NIHMS2002746-supplement-Supplement_Figure_S1.pdf [file NIHMS2002746-supplement-Supplement_Figure_S1.pdf]

Past-year HIV testing, current antiretroviral therapy use, and participation in services for people who inject drugs

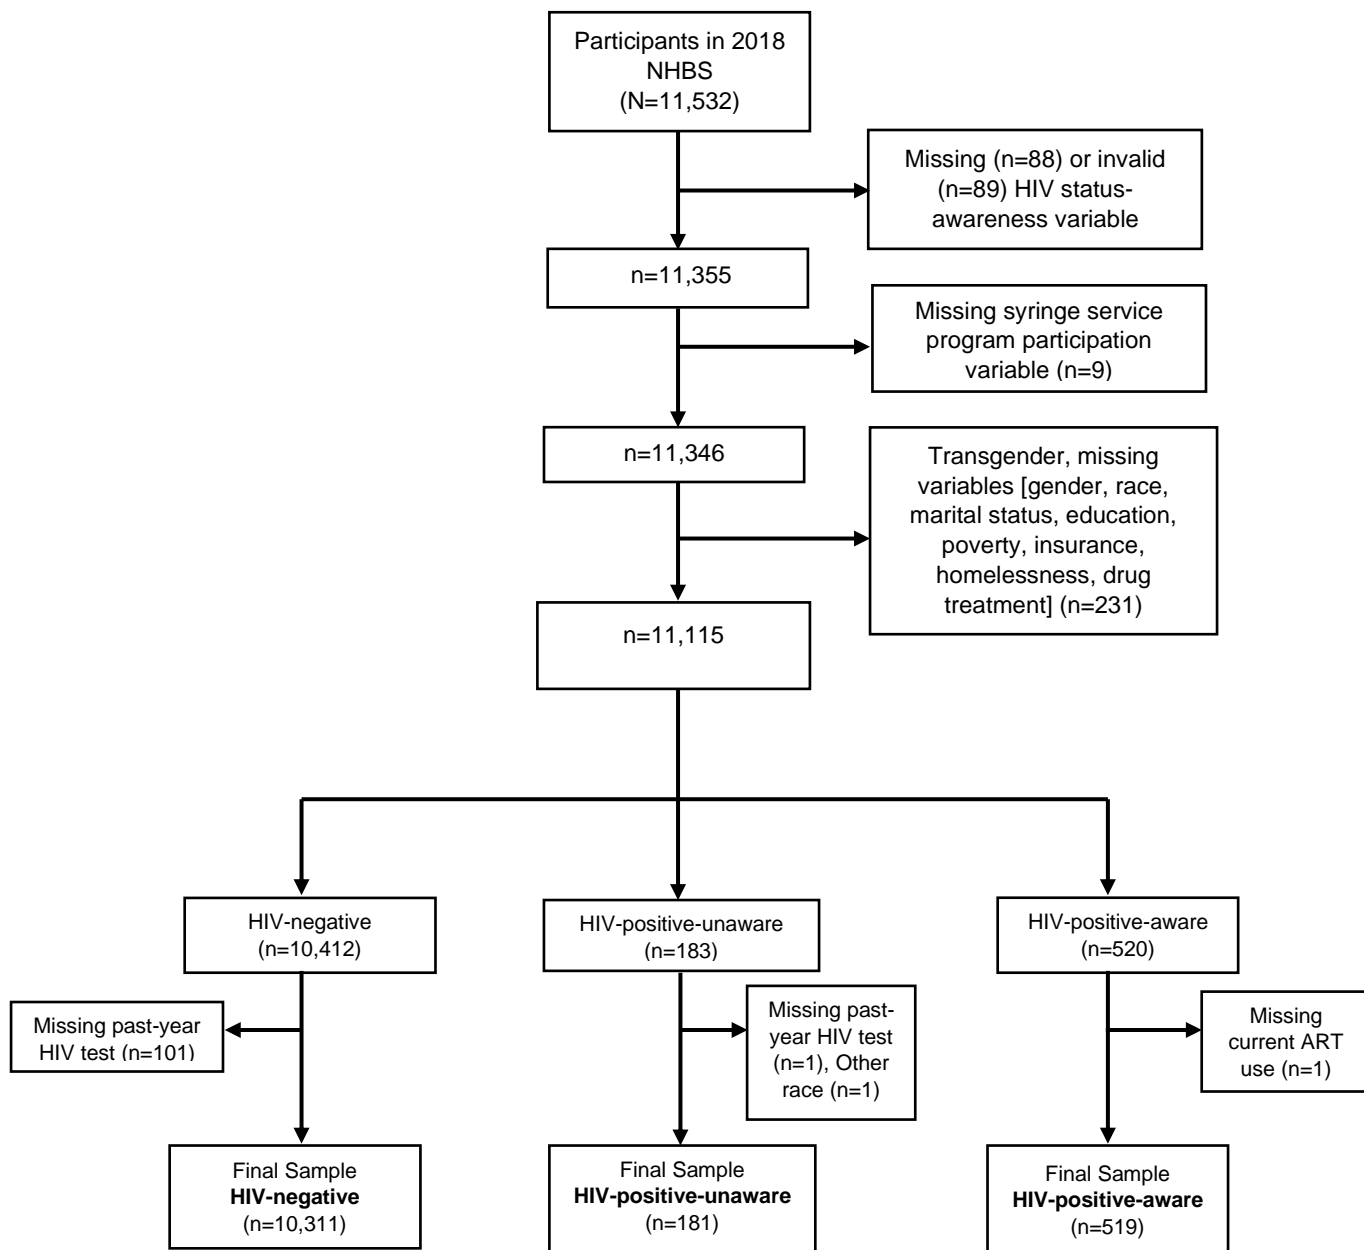

**Supplementary Figure S1.** Flowchart of selection of study population from the 2018 National HIV Behavioral Surveillance data. A total of 10,311 HIV-negative, 181 HIV-positive-unaware, and 519 HIV-positive-aware PWID were included in the current study.
